# Supplementary material for: Economic Grand Rounds: A Pay-for-Performance Program for Behavioral Health Care Practitioners
Source: Atypon-hosted journal article supplement (doi:10.1176/ps.2007.58.4.442), 2007-04-01
Supplement: pss_58_04_0442_02.pdf [file pss_58_04_0442_02.pdf]

| <b>Measure Description</b>                                                                                                          | <b>Aggregate Rate for All Participating Practitioners: 1999</b> | <b>Aggregate Rate for All Participating Practitioners: 2000</b> | <b>Aggregate Rate for All Participating Practitioners: 2001</b> | <b>Aggregate Rate for All Participating Practitioners: 2002</b> | <b>Aggregate Rate for All Participating Practitioners: 2003</b> | <b>Aggregate Rate for All Participating Practitioners: 2004</b> | <b>Aggregate Rate for All Participating Practitioners: 2005</b> | <b>Aggregate Rate for All Participating Practitioners: 2006</b> | <b>Change in Rate: First Measurement to Last</b> |
|-------------------------------------------------------------------------------------------------------------------------------------|-----------------------------------------------------------------|-----------------------------------------------------------------|-----------------------------------------------------------------|-----------------------------------------------------------------|-----------------------------------------------------------------|-----------------------------------------------------------------|-----------------------------------------------------------------|-----------------------------------------------------------------|--------------------------------------------------|
| Consent requested to share information with primary care physician (PCP)                                                            | 0.75                                                            | 0.87                                                            | 0.85                                                            | 0.95                                                            | 0.91                                                            | 0.90                                                            | 0.92                                                            | 0.92                                                            | 0.17                                             |
| If consent was given, information was shared with the PCP                                                                           | 0.86                                                            | 0.83                                                            | 0.89                                                            | 0.91                                                            | 0.82                                                            | 0.86                                                            | 0.84                                                            | 0.90                                                            | 0.04                                             |
| A substance abuse (SA) assessment occurred on intake (90801)                                                                        | N/A                                                             | N/A                                                             | N/A                                                             | 0.87                                                            | 0.93                                                            | 0.88                                                            | 0.94                                                            | 0.95                                                            | 0.08                                             |
| If SA assessment was positive, specific treatment for the SA occurred                                                               | N/A                                                             | N/A                                                             | N/A                                                             | N/A                                                             | 0.91                                                            | 0.90                                                            | 0.95                                                            | 0.97                                                            | 0.06                                             |
| Mean score (1 - 10 scale) on question "How likely are you to recommend this provider to family and friends?"                        | N/A                                                             | N/A                                                             | N/A                                                             | N/A                                                             | N/A                                                             | 8.40                                                            | 8.52                                                            | 8.23                                                            | -0.17                                            |
| Members with ten or more outpatient sessions for major depression who have at least one paid claim for an antidepressant medication | N/A                                                             | N/A                                                             | N/A                                                             | N/A                                                             | 0.83                                                            | 0.88                                                            | 0.88                                                            | 0.89                                                            | 0.06                                             |
